# Supplementary material
Source: publisher site journal article supplement (https://www.dovepress.com/article/543143)
Supplement: Supplementary file 1 [file 543143%20Revised%20Supplementary%20Material_1.docx]

**Supplemental Material**

**Tables**

**Supplemental Table 1** Reference population inclusion and exclusion criteria.

| Category | Detailed Contents |
| --- | --- |
| Inclusion criteria | 1. Adults aged ≥18 years 2. No heavy drinking or smoking;   (3) Female not pregnant or breastfeeding;  (4) No diseases including malignancy, chronic respiratory disease, metabolic disease, hypothyroidism, immune system disease, obesity (BMI ≥28 kg/m2), severe malnutrition (BMI <18.5 kg/m2), chronic diarrhoea, absorption disorders, hypertension, diabetes mellitus, cardiovascular disease, liver disease and kidney disease;  (5) No history of medication within 1 week, including therapeutic drugs or supplements containing vitamin B12 and folic acid;  (6) No surgery within 6 months; and no blood donation, bleeding or massive blood loss for 4 months. |
| Exclusion criteria | (1) Fasting blood glucose ≥7.0 mmol/L;  (2) Triglycerides ≥2.26 mmol/L; or total cholesterol ≥6.22 mmol/L;  (3) Alanine aminotransferase, aspartate aminotransferase, creatinine, uric acid, and haemoglobin outside the normal range. |

**Supplemental Table 2** Group partitioning of serum Hcy, Cys, and Met by sex.

| Criteria | Hcy | Cys | Met |
| --- | --- | --- | --- |
| Z | 9.29 | 0.45 | 2.59 |
| Z* | 3.94 | 4.00 | 3.99 |
| s2/s1 | 1.44 | 1.01 | 1.17 |
| Grouping | Yes/No | No | No |

Z = [(2-1)/ (s12/n1 + s22/n2)]1/2 and Z* = 3[(n1 + n2)/240]1/2., mean; s, standard deviation; n, number of samples, Grouping criteria: Z > Z* or s2/s1 >1.5.

**Supplemental Table 3** Multinomial logistics regression analysis.

| Indicators | B | S.E | Wald | df | Sig. | EXP (B) | 95% CI of EXP (B) |
| --- | --- | --- | --- | --- | --- | --- | --- |
| Hcy | 0.25 | 0.05 | 26.90 | 1 | 0.00 | 1.29 | 1.17-1.42 |
| Cys | -0.02 | 0.00 | 19.00 | 1 | 0.00 | 0.98 | 0.93-0.99 |
| Met | -0.28 | 0.04 | 41.01 | 1 | 0.00 | 0.76 | 0.69-0.82 |

B: regression coefficient; S.E: standard error; Wald values: Wald statistic values; df: degrees of freedom; Sig.: P values; EXP (B): OR values; CI: confidence interval. P values < 0.05 were considered significant.

**Supplemental Table 4** Reference intervals for Hcy, Cys, and Met identified in previous studies.

| Year | Country | Method | Analytical method | Age | N | Hcy | | | Cys | Met | Ref. |
| --- | --- | --- | --- | --- | --- | --- | --- | --- | --- | --- | --- |
| 2011 | Portuguese | Direct | FPA | 20.4±2.1 | 469 | 6.2-11.6 | | | / | / | [[1](#_ENREF_1)] |
| 2011 | Korean | Direct | FPA  CA | 50.1±13.4 | 809 | M:0-19.2  M:0-19.8  F:0-15.0  F:0-15.2 | | | / | / | [[2](#_ENREF_2)] |
| 2011 | Multi-ethnic | Direct | LC-MS/MS | 1-10d | 206 | | / | | / | 19–71 | [[3](#_ENREF_3)] |
| 2013 | Indian | Direct | EM | 20-81 | 1288 | M:6.4-16.5  F:6.6-16.3  T:6.5-16.4 | | | / | / | [[4](#_ENREF_4)] |
| 2014 | Korean | Direct | FPA | 45-74 | 3154 | M:5.0-13.8  F:4.0-10.2 | | | / | / | [[5](#_ENREF_5)] |
| 2018 | Thai | Direct | LC-MS/MS | <4d  6-12m | 277 | | / | | / | 10.7-17.7  9.4-21.9 | [[6](#_ENREF_6)] |
|  |  |  |  | 1-3 |  |  | | |  | 7-18.5 |  |
|  |  |  |  | 3-6  6-12 |  |  | | |  | 8.2-15.6  17.1-22.6 |  |
| 2019 | Chinese | Direct | ECM | 29.5±8.5 | 354 | FT, ST:5.8-11.9 | | | / | / | [[7](#_ENREF_7)] |
|  |  |  |  |  |  | TT:6.1-16.8 | | | |  |  |
| 2022 | Chinese | Indirect | LC-MS/MS | <40  40-50  ≥50 | 1553 | M:6.1-17.0  F:4.6-14.6 | | 188.9-334.3  200.5-340.7  216.0-349.7 | | M:19.3-33.7  F:16.2-30.4 | [[8](#_ENREF_8)] |
| This  study | Chinese | Direct | LC-MS/MS | 24-73 | 322 | M:8.7-19.6  F:6.2-14.8 | | 221.0-352.1 | | M:24.4-39.5  F:20.7-35.3 |  |

For consistency, all values are standardized to one decimal place; units: μmol/L.

Abbreviations: FPA, Fluorescence polarization assay; CA, Chemiluminescence assay; EM, Enzymic method; ECM, Enzymatic cycling method; F, female; M, male; T, total; d, days; m, month; FT, first trimester; ST, second trimester; TT, third trimester.

**
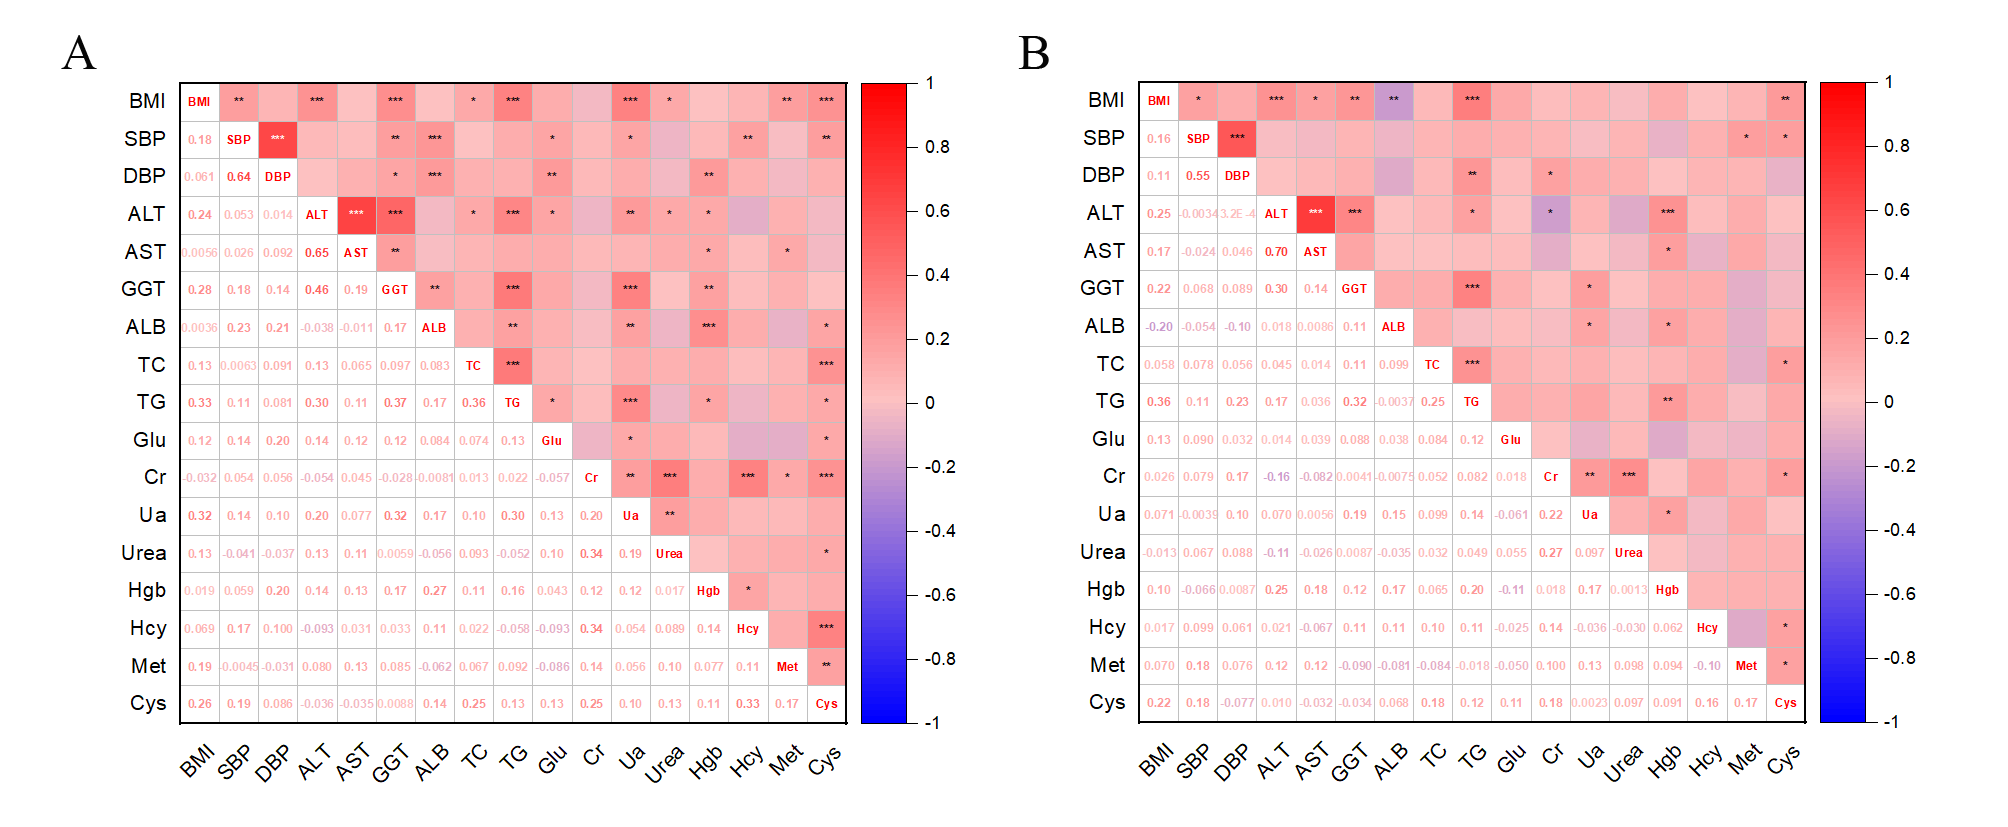
Figures**

**Supplemental Figure 1** Heatmap demonstrating Spearman correlations among Hcy, Cys, Met and other analytes between different genders. A:female; B:male.

Notes: The blue and red numbers represent the correlation coefficient, diagonal values of 1.00 denote perfect self-correlation; *p < 0.05, **p < 0.01, ***p < 0.001.

Abbreviations: Hcy: homocysteine; Cys: cysteine; Met: methionine; BMI: body mass index; SBP: systolic blood pressure; DBP: diastolic blood pressure; ALT: alanine aminotransferase; AST: aspartate transaminase; GGT: γ-glutamyl transferase; ALB: albumin; TC: total cholesterol; TG: triglycerides; Glu: glucose; Cr: creatinine; Ua: uric acid; Hgb: haemoglobin.

**Supplemental Material Reference**

[1] M. Brandão, F. Pimentel, M. Cardoso, Serum homocysteine concentrations in Portuguese young adults reference interval, Acta medica portuguesa 24 (2011) (2) 271-8.05.

[2] H. Moon, D. Whang, Y. Ko, S. Joo, Y. Yun, M. Hur, J. Kim, Reference interval and determinants of the serum homocysteine level in a Korean population, Journal of clinical laboratory analysis 25 (2011) (5) 317-23.05. <http://doi.org/10.1002/jcla.20476>.

[3] O. Oladipo, A. Weindel, A. Saunders, D. Dietzen, Impact of premature birth and critical illness on neonatal range of plasma amino acid concentrations determined by LC-MS/MS, Molecular genetics and metabolism 104 (2011) (4) 476-9.05. <http://doi.org/10.1016/j.ymgme.2011.08.020>.

[4] K. Lahiri, H. Datta, H. Das, Reference interval determination of total plasma homocysteine in an Indian population, Indian journal of clinical biochemistry 29 (2014) (1) 74-8.05. <http://doi.org/10.1007/s12291-013-0304-5>.

[5] S. Kweon, Y. Lee, S. Jeong, H. Nam, K. Park, S. Choi, B. Kim, H. Kim, J. Choi, M. Shin, Methylenetetrahydrofolate reductase 677 genotype-specific reference values for plasma homocysteine and serum folate concentrations in korean population aged 45 to 74 years: the Namwon study, Journal of Korean medical science 29 (2014) (5) 743-7.05. <http://doi.org/10.3346/jkms.2014.29.5.743>.

[6] J. Uaariyapanichkul, S. Chomtho, K. Suphapeetiporn, V. Shotelersuk, S. Punnahitananda, P. Chinjarernpan, O. Suteerojntrakool, Age-Related Reference Intervals for Blood Amino Acids in Thai Pediatric Population Measured by Liquid Chromatography Tandem Mass Spectrometry, Journal of nutrition and metabolism 2018 (2018) 5124035.05. <http://doi.org/10.1155/2018/5124035>.

[7] Y. Yang, H. Jiang, A. Tang, Z. Xiang, Changes of serum homocysteine levels during pregnancy and the establishment of reference intervals in pregnant Chinese women, Clinica chimica acta; international journal of clinical chemistry 489 (2019) 1-4.05. <http://doi.org/10.1016/j.cca.2018.11.026>.

[8] X. Cui, J. Xu, M. Liu, G. Ren, Y. Cao, Establishment of reference intervals of homocysteine, cysteine, and methionine in apparently healthy Chinese adults, Scandinavian journal of clinical and laboratory investigation 82 (2022) (3) 232-237.05. <http://doi.org/10.1080/00365513.2022.2056855>.
